# Supplementary material
Source: PubMed Central journal article supplement (PMC4441954)
Supplement: NIHMS689107-supplement-01.pdf [file NIHMS689107-supplement-01.pdf]

Molecular Cell, Volume 58

**Supplemental Information**

**Advances and Applications  
of Single-Cell Sequencing Technologies**

Yong Wang and Nicholas E. Navin
